# Supplementary material
Source: PubMed Central journal article supplement (PMC2099468)
Supplement: 7601905s1.pdf [file 7601905s1.pdf]

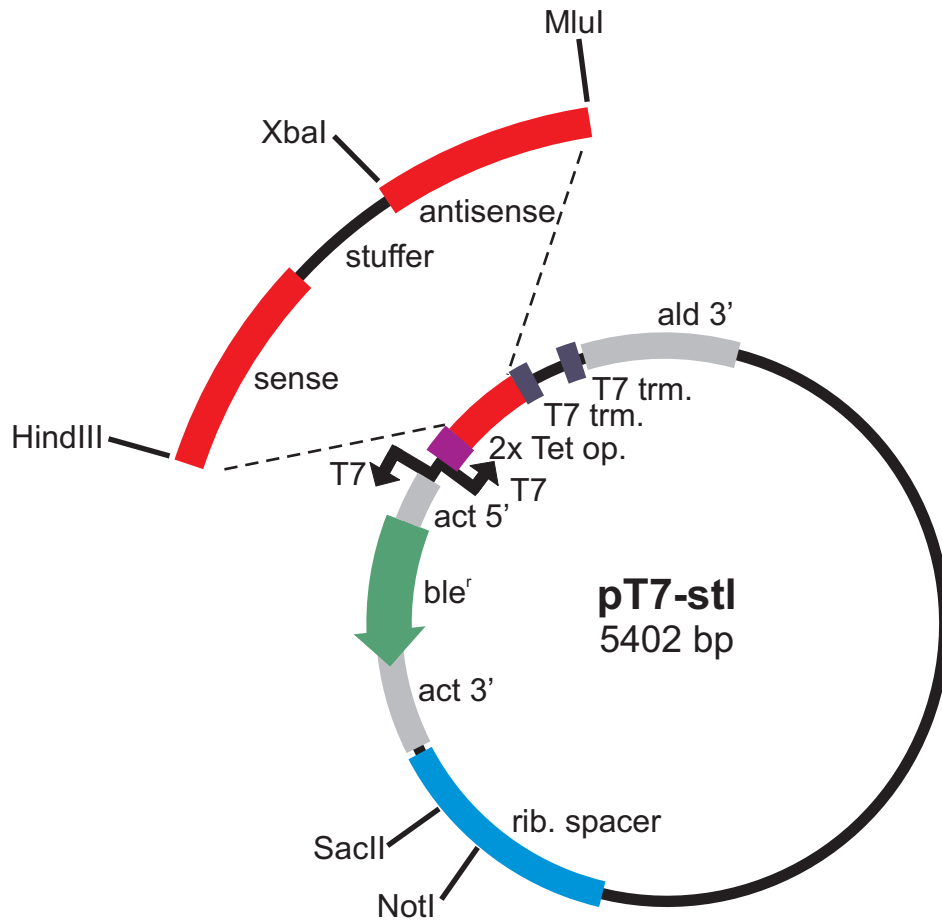

**Figure S1:** Schematic drawn to scale of the T7-stl vector for conditional dsRNA expression in *T. brucei*. pT7-stl is a derivative of pLEW100 (Wirtz *et al*, 1999) with two gene cassettes arranged head-to head. To the left, a T7 promoter (black arrow) drives the expression of the bleomycin resistance gene (ble<sup>r</sup>, green arrow) which is bounded by the actin A gene flanks providing *trans* splicing and polyadenylation signals (act 5' and act 3', minor gray boxes). The downstream ribosomal sequence (rib. spacer, blue) facilitates targeting of the construct into the transcriptionally silent spacer region of an *RRNA* locus. To the right, a T7 promoter under the control of two tetracycline operators (2x Tet op., purple) drives the expression of a stem-loop RNA whose coding region (red) can be introduced into pT7-stl analogously to the established stem-loop cloning strategy (Shi *et al*, 2000). The stem-loop RNA coding region is followed by two T7 transcription terminators (T7 trm.) and an aldolase gene 3' flank (ald 3').

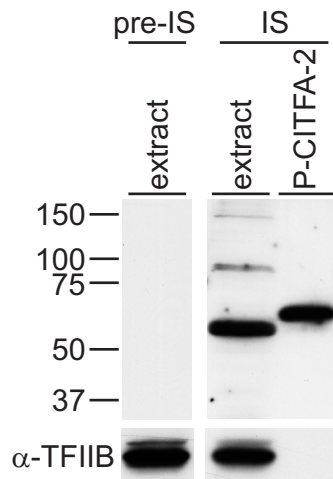

**Figure S2:** Immunoblots of procyclic extract were probed with anti-CITFA-2 pre-immune serum (pre-IS) and immune serum (IS). In the latter, purified CITFA-2 (P-CITFA-2) was co-analyzed. Detection of TFIIB served as a loading control.

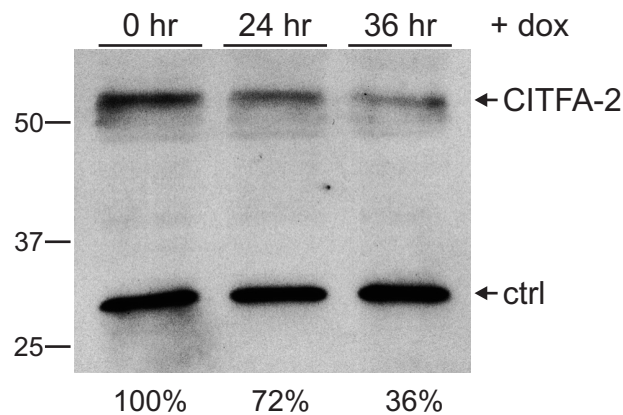

**Figure S3:** Immunoblot analysis of *CITFA-2* silencing in procyclic trypanosomes. Whole lysates of  $10^6$  cells harvested before and 24 and 36 hr after induction of *CITFA-2* dsRNA synthesis were separated on a 12% SDS/polyacrylamide gel, immunoblotted and detected with anti-CITFA-2 serum. The non-specific protein band of 30 kDa served as a loading control. The relative CITFA-2 signal strength normalized with the control signal is given below each lane. In contrast to bloodstream RNAi cells, the pZJM-transfected procyclics grew poorly and the silencing of CITFA-2 was less effective.

|    |                                                                    |     |             |
|----|--------------------------------------------------------------------|-----|-------------|
| Tb | MPEVGTQVYWHDFEDAPPPWKNEEELAKMIEISSSIEGPI SDARH-----                | 45  |             |
| Tv | MPDVTTOVYWHDI PGAQAPWODEOEYARMWVI SSKIKGLVSDRSH-----               | 45  |             |
| Tc | MPEFGTOVYWHNI PACPPPWKDEEERARTWRI SORIVCAISDORH-----               | 45  |             |
| Lm | MPIKETOVYWHDL PTPRPPWRNVEELKOCVLESKRIAAQMARQWRSVCGSVPALQSSIP       | 60  |             |
| Li | MPAKETQVYWHDL PAPRPPWRNAEELKOCVLESKRIAAQMARQWRSVCGAVPALQSSIP       | 60  |             |
| Tb | MI VOPREVIYI SMRTKLRNRQOPCNR----YWSIVLEPHFGPI I LGNMVMREIKVIEMVTRE | 101 |             |
| Tv | LILOPLRKEVLOMRARIRRKPPPSDR----FWGIVLEPYLSPLILGLNMIMKELOVPGVTYE     | 101 |             |
| Tc | LIIEPPRAEILAKRILPGRFAPKRVHR----YWGIVCEPHLSPLHGLNMVMSELOVRPIATE     | 101 |             |
| Lm | RALPSRAEQVSRAERLRDRATRHIERPVLFRRVVPEPHATPLOVNLIMEHLRORPVLTA        | 120 |             |
| Li | RALPSRAEQVSRAERLRDRATRHIERPVLFRRVVPEPHATPLOVNLIMEHLRORPVLTA        | 120 |             |
| Tb | EAAEAVNGVVEEFNAMSOLYSATDGAND-----CLG-----TALSGKS-----              | 139 |             |
| Tv | EAAAIVSVVEEYNI LTOQFGTOOGSQW-----SEYEANVTQRSTVSRRNA-----           | 147 |             |
| Tc | EAKEAVSVVCELYNAMTOQQ--OKSTQS-----GILSQGGVKTEILTOOSN-----           | 145 |             |
| Lm | EAAEVAERVTLHFNMLTSSQHRREGGASRPRCNRGACPRAGCVATESVLSOVHQDDA          | 180 |             |
| Li | EAAEVAERVTLHFNMLTSSQHRREGGASRPRCNRGACPRGGGTATESVLSQVQEQDDT         | 180 |             |
| Tb | -----AQAMDVKVAPFLEVVRKLCPEPRNLDVVEWNRDELRRRGRI                     | 179 |             |
| Tv | -----TPAMDVKEAPLLEVVKILCADRKLIVTPLSKEELRRKGR                       | 187 |             |
| Tc | -----TAAMDIREAPLLOVVKILCASRGLVSPFSKAELRRSKGR                       | 185 |             |
| Lm | RLGLTSSQATIGTSGGTAGSLTMALOSLLLDITVAEFCAARGLVFRRLSRADLRGMRHRV       | 240 |             |
| Li | RLGLTSSQATIG---GTAGSLSMALQDSLLLDITVAEFCAARELVFRRLSRADLRDMHRV       | 237 |             |
| Tb | AFTDLLYHKRVVMI VDTSKPHFLICLVTHKKRLT-----DKR- EV                    | 219 |             |
| Tv | SFSDLVSHKRVVIAFDRSKPHFAFALGVVKKKAE-----AVG-QV                      | 227 |             |
| Tc | GVADLLPRRRVIMAFDRSKPKFVFATAVPAKKKKD-----AEKSTV                     | 226 |             |
| Lm | SSVEVVPYRRVVVLADRHDPIFAVLFVGSROVTPPEPFVVSALQLDGKTPESIARYRKAFA      | 300 |             |
| Li | SSVEAVPYRRVVVLADRHDPIFAVLFVGSROVTPPEPFVVSALQLDGKTPESIARYRKTFA      | 297 |             |
| Tb | YCMOLLIAPTASVVPWRRITKYALVSPRAREFVITITTKRDSVK-----NSNLSIDVIGAA      | 274 |             |
| Tv | RCMOLVAPTANPIPWRRIVKVGMERLSANDCVVVVVORQDD-----CSQKGLGLOS           | 277 |             |
| Tc | CYIOLVAPNSNPVWROLKREIIPYLPNECVVAVORHHHDEEYDDDDEKNSGDGPYL           | 286 |             |
| Lm | PVTOVFCMAPAPVWRRITITNISVSTLRLDEFVVAVIELDEFAEE--TADADRNGDOVSTHR     | 358 |             |
| Li | PVTQVFCMAPAPVWRRITITNISVSTLRLDEFVVAVIERDEDEE--TAGADKNGDOVLTNR      | 355 |             |
| Tb | PEAKSASOKDLEDGEDGDYDDEEAEDEYDNDDDDDDEDDGDEDENSNDGDNRPKRARVA        | 334 |             |
| Tv | DHENEDDDVQIND-----GEGGEPIPRIPHKR--PREEGNERDGESGRSVAMSESS           | 326 |             |
| Tc | SDANVRSEVLLGGNESDKYDLGEEGDAOPROHEEGETPOKRHKCEYEDKIDFSDMSEVS        | 346 |             |
| Lm | SCAKRGRTGVTGATALPRKMORLPVDILGGDEEEEGEMGLVSDAGEDGDAEAAILNPA         | 418 |             |
| Li | SCAKRGRTAVTSAAARPRKMORQLVDILGGDEEEEGEMGLVSDAGEDGDAEAAILNPA         | 415 |             |
| Tb | DSVDNSETDLSLNNEDYPFLDEIDAYERMRTGSAPIFSAEDRVLD-----                 | 379 |             |
| Tv | ESVSEGGDEERNY-----DKIR---FCRNPIFTEKDYIQD-----                      | 358 |             |
| Tc | ESIGSTTASCRSD-----EAKRKKFVGREPIFTAEEKIQN-----                      | 381 |             |
| Lm | ATPTVASSSATER-----VPLERRWLGSAPLFSGTTQLAETAPGEVAVEMVDPTR            | 468 |             |
| Li | ATPTVVSSSATER-----VPLERRWLGSAPLFSGTTQLAETAPGEVAVELAGPTR            | 465 |             |
| Tb | ---DPLFNTPVATYRRASRATREGRDWVYRFTHONDRNKLFAITN                      | 421 | 100%/100%   |
| Tv | ---DPLFRTPVAILRKNKRVAGEVHDWIORLVRNKERNKLFAINI                      | 400 | 38.1%/55.3% |
| Tc | ---DPLFETPVAVLRKLRKTRGVHDWIORLINPVARKRLYAINY                       | 423 | 33.4%/50.1% |
| Lm | GAYDPLINLPRSEG-AARRRGSLORAWYRRLIPKGSDDFMARMHTYQADE                 | 517 | 22.9%/37.0% |
| Li | GAYDPLINLPRSEG-AARRRGSLORAWYRRLIPKGSDDFMARMHTYQANE                 | 514 | 23.4%/35.1% |

**Figure S4.** Sequence alignment of trypanosomatid CITFA-2 orthologues. ClustalW alignment of CITFA-2 sequences from *T. brucei* (Tb, GeneDB accession number Tb09.211.3440), *Trypanosoma vivax* (Tv, tviv913g02.p1k\_2), *Trypanosoma cruzi* (Tc, Tc00.1047053510741.100), *Leishmania major* (Lm, LmjF35.3150), and *Leishmania infantum* (Li, LinJ35.3250). Identities and similarities are shaded in black and gray, respectively. Only positions with a minimum of three identical or conserved residues are shaded. Identity / similarity values specified at the end of each sequence were determined by pair-wise comparison with the *T. brucei* sequence using the EMBOSS program (<http://www.ebi.ac.uk/emboss/align/>) at default settings. *T. cruzi* has a nearly identical CITFA-2 paralogue (Tc00.1047053510661.150) which was not included in this analysis.

|    |                                                                |     |             |
|----|----------------------------------------------------------------|-----|-------------|
| Tb | MSN-----EVESSAAEPPAPDEATNVAG----HRVILINNILCRTEETSD             | 40  |             |
| Tv | MNDRDANNVEVVIIVDDASTTSSPTKQASNKRGSAVNVHFLILINGILCRTEAPD        | 53  |             |
| Tc | MMALDDMVAPFREEFTDRSCRDERNRHRFFFLINGILCRTEHNSD                  | 43  |             |
| Lm |                                                                |     |             |
| Li | MSRQPSRSSSPGTALPSEATVTTASQLPSYPSASRSCQKVDEPGAFLLLNGFVCRTADAS   | 60  |             |
| Tb | GSFRPSDVVFGLD-PPPRGTATLGSAAEDNCNHLVSGEFDPTAYVDSISKDCSIFNVFGV   | 99  |             |
| Tv | ASFRPSDVVFGLD-PPPRGTTTLGSASVDNQN--SIYQFHS----ESVSRDCSIFNFTFGV  | 106 |             |
| Tc | GSFRPADVVFGRD-PPPRGTAMLGEASRIFDDSAVAPSFAD-----VDRDCSIFNFTFGV   | 96  |             |
| Lm | MPSANAHFSLSAGSAEETR----RSIDSDCPLFNCFGV                         | 34  |             |
| Li | GRFRPVEVFSGVYREAATAPPTMPSANAHFSLSAGSAEETR----RSIDSDCPLFNCFGV   | 116 |             |
| Tb | MSCGVLVDSESRGFIDFTDDMIFRPPLPPPVE-----GNDTHNEGSRD               | 142 |             |
| Tv | LSGGIIVDPQTLRFMDFTDDMI FOPPTFGDDA-----ENCWHYDNL SY             | 149 |             |
| Tc | ESGGVLIDPNTRCFVDFVDDIVVTPTLCKE EAN-----GNVPHYKSLEY             | 140 |             |
| Lm | LSGGVIIDPIDGSMFEFTDAAVYTPSTVAAQVDITGNDTQDDLARCTLQOANEHAFRTGAT  | 94  |             |
| Li | LSGGVIIDPIDGSMFEFTDAAVYTPSTVAAQVDITGNDTQDDLARCTLQOANEQAFRTGEA  | 176 |             |
| Tb | GQIRADGVVSLVSSIFPFNGLGTV-----DTPLPWP-RSLPRLRSORISYRLAAKT       | 192 |             |
| Tv | WKIRANAMASLMSTIHPMNAPGTE-----ESPLPWP-RSMPRLRCSRVANSLAROS       | 199 |             |
| Tc | AKIRGEGVMCLCSSIEPLNVACKR-----DTPLSWP-RSM-RLTCSAEARFLALRN       | 189 |             |
| Lm | HLIRPECPILILCTSELPLPPRSDDRPLNRFKCRSSPLSAAGSTGPTVTSARHAAQMGMEN  | 154 |             |
| Li | HLIRPECPILILCTSELPLPPRSSDPPLKRFKCCSSPFSAAAGAGPTVTSARHAAQMGMEN  | 236 |             |
| Tb | VHRMLSRCVGNVKCNK-----AVLVVLESYRIHRKHLHSPQLT----FLPNEIPFR       | 238 |             |
| Tv | VDRMGARLAVNVVFDPE-----TKLGLVEEFRHHLKLTFFPQIT----FLPGEIPYR      | 245 |             |
| Tc | VDRILRRCLTEVSANR-----KMFRLVEGYRCHIKSKRPPOS----FMTQNIPTI        | 235 |             |
| Lm | VEKWLNLAPHPGHRPQSPRRQAWTTVWADAEEFRLSMRAHSDVRASEASLYLPPRIPTFP   | 214 |             |
| Li | VEKWLKRLAPHPGHRPQSPRRQAWTTVWADAEEFRLSMRAHSDVRASEASLYLPPRIPTFP  | 296 |             |
| Tb | FOWHGMTFR--VKDGGAPKRFDANGNRTHEYRSPIGRINHMDGKTG-SAYSSFHAFATG    | 294 |             |
| Tv | FOHGCRTLRSWAENAGHCNNTLAVVEIADSNGRRPVDSEARAAPVRIITSTSPFSEFHITFG | 305 |             |
| Tc | FOYGGRPFL-----LQDDSDKEKENRS-----FPTPGPLFSEFHAFATG              | 273 |             |
| Lm | LRFRGQPISLIEGANESPAASQOQQPDREANSATAVPPDGVRCAAASFTCYTGVPRFAT    | 274 |             |
| Li | LRFRGQPISLMEEKTNESPTASQOQQPDREANSATAVPPDGVRCAAASFTCYTGVPRFAS   | 356 |             |
| Tb | ----LPKMAFRRYRESARRSRHLENLADGYSRRLERMRIQNIIVHPIREEMHIDENIEVV   | 350 |             |
| Tv | ----LPKMIFRRYREAIKRDLSGLVKKSLSYAQRIEMRVONVHFPIRKNLQISDRITAFG   | 361 |             |
| Tc | ----LPKMVRMKTGEVDTYN-----HGVEFGLRLEKRLQSMKPLRKNLFIGRRVLRD      | 322 |             |
| Lm | ATDTAPRFDSAEFAKGTAVARLRKRLRPYCETSSLGRRRSSSDYDEADREGFLIPFTDST   | 334 |             |
| Li | TTDTAPRFDLAEFAKGTAVARLRKRLRPYCETASLGRRRASDDYDEEDKERFLIPFTDST   | 416 |             |
| Tb | FRRRSGVHLWSAFORYFTILG-----SRCTSCNTPNCNAWYLDNDDKVDYPSALR        | 401 |             |
| Tv | KRRKGYKRHWNIHRYFTLLR-----AKPCLTCGNPNCNVWHFGADDDVDYVEKVA        | 412 |             |
| Tc | KSMTRMRKYWYTFWRYFKIFR-----VYPAPSPNADGRSEWHLADDRHVNYEKAVL       | 373 |             |
| Lm | PRHAAFALFLLYFNHLGVLCNGVVRTGETAASSCLDGLDVGSTTWGLCPKYLYDVRAEVE   | 394 |             |
| Li | PRHAAFALFLLYFNHLGVLCNGVVRTGETAASSCLDGLDVGSTTWGLCPKYLYDVRAEVE   | 476 |             |
| Tb | KLEEDLKYRR-----TFNLSSSILADSWDWLLAKERGPITERIRKTIKYAR            | 447 |             |
| Tv | AEEEEAKKIHR-----SDKVNSAVVSDAWDWLFLNEKEELOQRIGKIVRAIK           | 458 |             |
| Tc | EFEERARKYG-----NSEWDRITAVVDAWDWLVHERHSFLRRLAKVERCLD            | 419 |             |
| Lm | RKRRVTRELREHPERTFAGGTRWSTTARNRDAAAATAALLISSRTALLERITELNRHIH    | 454 |             |
| Li | RKRRVTRELREHPERTFAGGTRWSTTARNRDAAAATAALLISSRTALLERITELNRHIH    | 536 |             |
| Tb | QIDAENKREVINTDKDLR                                             | 465 | 100%/100%   |
| Tv | AIKAQRKK--LITSEC                                               | 471 | 42.2%/59.0% |
| Tc | KIQL                                                           | 423 | 35.3%/48.2% |
| Lm | KLHDEKQRRRHADDQENQ                                             | 472 | 20.0%/32.0% |
| Li | KLHDEKQRRRHADDQENQ                                             | 554 | 23.5%/37.1% |

**Figure S5.** ClustalW sequence alignment of trypanosomatid CITFA-1 orthologues corresponding to Figure S4. GeneDB accession numbers of the sequences are Tb11.47.0010 (Tb), tviv163a09.p1k\_0 (Tv), Tc00.1047053508505.30 (Tc), LmjF27.0830 (Lm), and LinJ31.0920 (Li). The *T. cruzi* paralogue (Tc00.1047053503893.160) is nearly identical to the TcCITFA-1 analyzed.

|    |                                                                |                 |
|----|----------------------------------------------------------------|-----------------|
| Tb | MSHRISSSTNNPFSERDFN----LLKSGALEKSRSVVSRREQ-VWVNDIVDVGEGVKANDVE | 55              |
| Tv | MSRRMSSSYRDTYSERDYEERRHRLRSGAIVTSRSRITGTEV-ODEKIVNVGEGVKANIYE  | 59              |
| Tc | MSYWATSEGRALSAGHTSRLSWCMRSGAMATSRSAMTOTELELRDRIVDVGEGVIANFEE   | 59              |
| Lm | MPSEADLDRLRCR-----LHOSGATVSSRSVASRADANFDLEVVNVGDGRRATPVE       | 51              |
| Li | MPSEADLDRLRSR-----LHOSGATVSSRSVASRADANFDLEVVNVGDGRRATPVE       | 51              |
|    |                                                                |                 |
| Tb | ELMARLEOHGLRRVLAE-----NEGGTGALHAADGTHGTENCDSITIEDIDEDDSC       | 105             |
| Tv | OLLARLEOHGLRRCFVEDADEANLEAREESCD---DATIVDDDGRLSLISGWTYGNPCTS   | 116             |
| Tc | OLLARLEOHGIRRCILHD--DKETIYEDGTNNGDKNLHHSISLSDFCSMASSLRPSVKORME | 117             |
| Lm | HLLARLEOHGLRRRLVAEDDAAAYAVDAAARADTEENADDDGDEMYASEEGNTEDPRAVS   | 111             |
| Li | HLLARLEOHGLRRRLVAEDDAAAYAVDVAARADTEENADDDSDETHASGDGNAEDPRAVS   | 111             |
|    |                                                                |                 |
| Tb | -----EKRAPYYYYMCVPCELSLTEISTKPATMRMLODAHYHFSSAEH               | 147             |
| Tv | -----ESRSPYYYYMCVPCEMKLTATCTTAATLRMLODAHYHFSSAKH               | 158             |
| Tc | -----DAREPYYYYVCPCELOLTETSTSAATLAMLQDVHYHCSSAEH                | 159             |
| Lm | SCSSGDGAFSSPAPSKAPEETREAYYYLCVPCELRLTRISRRPWRRALEDVHFHFSSAAH   | 171             |
| Li | SCSSGDGAFSSPAPSOAPEETREAYYYLCVPCELRLTRISRRPWRRALEDVHFHFSSAAH   | 171             |
|    |                                                                |                 |
| Tb | RCIASWVGVDIEKTLAVTSRLEVGG-YIRIFVNGIPFLISARPGGGGMFYPLPHEITVEA   | 206             |
| Tv | RCEASWVGQDIDRITLNNSAEVDVNG-YMRIYVNGIPMLLPRRPGGGDMFYPLPHEEFDY   | 217             |
| Tc | RRIASWVGEPDIDRITLONSAKIDPTG-YAWIHVNGIPMLLPRRPGGGDMFFPLPHEAHD-  | 217             |
| Lm | RATASWMADDDDIDETLHSTPLVTPPTHYYSRIYVNGVPTLLSRRPGGGDMFYPLPHEQDLV | 231             |
| Li | RATASWMADDDDIDETLHSTPLITPTNYYSRIYVNGVPTLLSRRPGGGDMFYPLPHEQDLV  | 231             |
|    |                                                                |                 |
| Tb | REOSGRNAEP--SKGTAV-----RKEITWYRPIOS                            | 233             |
| Tv | RDRATSVGRDGHLLHTIMR-----RKEYIYWRPIOS                           | 246             |
| Tc | QERIAPSGMDGLLFATQQ-----HTEVWNRPLRS                             | 246             |
| Lm | APPSAAAARDGNRVDCLHGSRTVSNSSSEASGAPAGRFFPPSTLRGAQGGQPVLWHRALPS  | 291             |
| Li | APYSAAAARDGERVDCWHGSQTVSNSSGASGALAGRFFPSSTLRGAQGGAPVLWHRALPS   | 291             |
|    |                                                                |                 |
| Tb | VFTRCKOILYTAASR--QKLRGESSPFRAORRNGIVLL---HIPMKTYERESFIRGPSVP   | 288             |
| Tv | IFTGTKOLVYSADSR--VRLRTKKTPLRFORRNGVVIL---HVPMDTYAKESFVDGPTVP   | 301             |
| Tc | IYTGTKOFLYSVDNN--RRICKKKWTKLKRNRNFVLO---HIPLDVYTTIGTFVGDATVP   | 301             |
| Lm | LCTRTVQVVRRTRSSSLTDLPADRRRYRVARTRSRVMVGVGDHCSLDEYRQOSWMLPHKVP  | 351             |
| Li | LYTRTVQVVRRTARSSCLADLPADRRRYRVARRRSRVMVGVGDHCSLDEYRQOSWMLPHKVP | 351             |
|    |                                                                |                 |
| Tb | ---ALFEVQRERVSNNKRR-HKENG-----TRTCYVMREKP                      | 320             |
| Tv | ---ALFOVDRKRMKPKVGKN-ETSDG-----YRVAYVASKKP                     | 333             |
| Tc | ---ALFEITTOORLPKKAQYGAETT-----YRMKYVVS DKP                     | 334             |
| Lm | LSLAVYRLRRRERVPKPLLARPESAGPQGQAVPLRFSESAVRAAQAADVAHRTVYVYTPYHP | 411             |
| Li | LWLAVYRLRRRERVPKPLLARPESAGPHGQAVPLRCSESAVRAAQAADVAHRTVYVYTPYHP | 411             |
|    |                                                                |                 |
| Tb | IAAWED-----EDDSTDAISK-VITVKEEGVYRVLVILCSDDVRRSMRQAEHEHEPE----  | 370             |
| Tv | MMVWNE-----KDARPTALNR-ITVSDGDIYRVALIHA-DVAKALLSGEP-VEEPD----   | 381             |
| Tc | CMVWN-----DAMEGLSS-FVVRNNGIYRVSLICAGDAAKWASQGPPPAGSTQ----      | 382             |
| Lm | IAEGSRDYHRQGDAFATAAVPVPTTVFEDECYRVALVSAAEQARREGLSHPEASRKVSHSL  | 471             |
| Li | IAEGSRDYQRQGDAFATAAVPVPTTVFEDECYRVALVSAAEHARHEGLSHPVTSRPLSRSL  | 471             |
|    |                                                                |                 |
| Tb | --TRVSGEVTHP--LITVEALQMTGGTIRRES-----NOSDGKSLSL-YDSS           | 410             |
| Tv | --HGVIADNEPATITLLEATRRIGAISSVVG-----FGSRSGSPSDSRSDSP           | 426             |
| Tc | --DAHTGCEGHISQMLTVEALIQLRRASTVGRN-----FHVLSTSELDA-SDSL         | 427             |
| Lm | FPADVASEEIIHRPVLTLELLMOHTQSTOSWRPAFGLNTALDSSFVPSAPPSPSRSSI     | 531             |
| Li | CPADVASEEINRPVLTLELLMOHTQSTAQSWRPAVGSSTALNSSFVPTAPPSPSCSSI     | 531             |
|    |                                                                |                 |
| Tb | SWSRKT                                                         | 416 100%/100%   |
| Tv | SDSRSSSFIIIDSVADSSNNSIQLDDI                                    | 453 43.4%/59.8% |
| Tc | IHSEVTSYVSS                                                    | 438 38.4%/51.8% |
| Lm | SHLTRSSSSGSTSSSTSSEHSSTSRSSSTHTRKRVKLDGCL                      | 571 29.5%/40.2% |
| Li | SHLTRSSSSGSTSSSPSFEHSSTSRSLTHTRKRVKRDGCL                       | 571 28.8%/39.8% |

**Figure S6.** ClustalW sequence alignment of trypanosomatid CITFA-3 orthologues. GeneDB accession numbers of the sequences are Tb11.47.0008 (Tb), tviv163a09.p1k\_2 (Tv), Tc00.1047053508505.10 (Tc), LmjF27.0850 (Lm), and LinJ27.0440 (Li). The *T. cruzi* gene Tc00.1047053503893.181 is at the end of a contig and predicted to encode the identical N-terminal 128 amino acid sequence of the TcCITFA-3 analyzed suggesting the existence of a paralogous gene.

|    |              |       |       |        |         |        |       |         |      |      |     |     |     |
|----|--------------|-------|-------|--------|---------|--------|-------|---------|------|------|-----|-----|-----|
| Tb | MSTLASALPLLA | TKNVL | CGVTG | STIOFF | CDLTRDY | CP     | ST    | TKKSV   | IASS | CGNR | P   | GT  | 58  |
| Tv | MPIPTTAVPL   | LLMSK | NVM   | IDVS   | EETILL  | VYCDI  | HONSG | QSSTGRS | II   | IATS | G   | G   | 58  |
| Tc | MESSTLANA    | IPFC  | GKNI  | LVALE  | ESNLY   | IYCDLS | ODLGR | TSSGKN  | I    | LIAT | T   | GG  | 60  |
| Lm | MSE          | RC    | DM    | K      | AK      | N      | L     | R       | M    | V    | V   | O   | 55  |
| Li | MSE          | RC    | DM    | K      | AK      | N      | L     | R       | M    | V    | V   | O   | 55  |
| Tb | GAHIVLN      | VFFAK | E     | KPOL   | DED     | TLAP   | L     | RTR--   | E    | V    | E   | G   | 115 |
| Tv | GSYMCLN      | L     | FC    | H      | S       | F      | SS    | R       | L    | D    | E   | A   | 115 |
| Tc | NAFLGLN      | VFC   | N     | IE     | G       | PKL    | T     | D       | E    | T    | I   | S   | 116 |
| Lm | GAFLGLN      | I     | F     | T      | K       | S      | L     | D       | K    | R    | D   | L   | 115 |
| Li | GAFLGLN      | V     | F     | I      | K       | S      | L     | D       | K    | R    | D   | L   | 115 |
| Tb | KKV          | G     | K     | R      | G       | T      | V     | L       | A    | S    | R   | C   | 174 |
| Tv | RKADI        | T     | G     | A      | I       | L      | L     | A       | S    | S    | G   | N   | 174 |
| Tc | K            | L     | A     | T      | T       | C      | N     | S       | V    | V    | L   | A   | 175 |
| Lm | R            | L     | G     | A      | S       | G      | K     | S       | M    | L    | L   | A   | 175 |
| Li | R            | L     | G     | A      | S       | G      | K     | S       | M    | L    | L   | A   | 175 |
| Tb | D            | I     | G     | N      | G       | F      | I     | M       | N    | V    | E   | S   | 222 |
| Tv | E            | I     | G     | E      | G       | F      | S     | L       | T    | V    | E   | S   | 222 |
| Tc | E            | L     | N     | E      | G       | F      | V     | V       | H    | V    | E   | S   | 223 |
| Lm | S            | M     | E     | G      | G       | F      | V     | S       | Y    | T    | P   | T   | 235 |
| Li | S            | M     | E     | G      | G       | F      | V     | S       | Y    | T    | P   | T   | 235 |
| Tb | R            | C     | G     | V      | K       | R      | N     | A       | A    | Y    | E   | N   | 270 |
| Tv | K            | R     | S     | G      | T       | R      | K     | V       | R    | T    | N   | --- | 267 |
| Tc | R            | F     | V     | D      | K       | L      | R     | S       | E    | E    | --- | --- | 263 |
| Lm | K            | T     | A     | M      | R       | A      | T     | E       | D    | E    | K   | Y   | 295 |
| Li | K            | T     | A     | M      | R       | A      | T     | E       | D    | E    | K   | Y   | 295 |
| Tb | -----        | NTE   | ---   | R      | I       | R      | L     | E       | V    | R    | F   | D   | 317 |
| Tv | -----        | NQE   | ---   | V      | I       | V      | D     | I       | R    | F    | D   | P   | 314 |
| Tc | -----        | N     | N     | S      | R       | G      | T     | V       | D    | F    | Y   | L   | 312 |
| Lm | E            | A     | A     | V      | S       | A      | G     | S       | O    | T    | C   | A   | 355 |
| Li | E            | A     | A     | V      | S       | A      | G     | S       | O    | T    | C   | A   | 355 |
| Tb | H            | R     | S     | P      | V       | S      | L     | A       | S    | D    | T   | V   | 377 |
| Tv | O            | R     | T     | P      | E       | S      | I     | L       | T    | S    | A   | E   | 374 |
| Tc | H            | K     | P     | A      | P       | H      | L     | S       | P    | A    | E   | I   | 372 |
| Lm | G            | R     | P     | A      | P       | S      | L     | S       | E    | A    | E   | I   | 415 |
| Li | G            | R     | S     | A      | P       | P      | L     | S       | E    | A    | K   | I   | 415 |
| Tb | A            | I     | I     | S      | H       | F      | H     | R       | R    | A    | F   |     | 388 |
| Tv | A            | V     | I     | K      | Y       | L      | K     | E       | R    | G    | Y   |     | 385 |
| Tc | A            | V     | K     | A      | Y       | M      | G     | S       | L    | K    | L   | S   | 472 |
| Lm | A            | V     | V     | A      | F       | V      | O     | A       | A    | A    | T   |     | 426 |
| Li | A            | V     | V     | A      | F       | V      | O     | A       | A    | A    | T   |     | 426 |

**Figure S7.** ClustalW sequence alignment of trypanosomatid CITFA-4 orthologues. GeneDB accession numbers of the sequences are Tb11.01.0240 (Tb), tviv140b09.q1k\_4 (Tv), Tc00.1047053508819.20 (Tc), LmjF28.0430 (Lm), and LinJ28.0320 (Li). The *T. cruzi* paralogue (Tc00.1047053509595.40) is nearly identical to the TcCITFA-4 analyzed.

|       |    |                                                                 |                 |
|-------|----|-----------------------------------------------------------------|-----------------|
| Tb5a  | 1  | MCLSKIFSPVDOSLKVLVEVM--TRLAGOEVVKGTRK--RGRSKECGTDEEFAHFVIRINGRV | 58              |
| Tb5b  | 1  | MCLSKIFSPVDOSLKVLVEVM--TRLAGOEVVKGTRK--RGRSKECGTDEEFAHFVIRINGRV | 58              |
| Tco-1 | 1  | MSLGRKRARSDDAYNVEVSGHPTRATYDSGVOOVHNPGRGRSTSPGVNGE--FFLIRVNGKS  | 59              |
| Tco-2 | 1  | MSLGRKRARSDDAYNVEVSGHPTRATYDSGVOOVHNPGRGRSTSPGVNGE--FFLIRVNGKS  | 59              |
| Tc    | 47 | FHTNEESMPLHSSTREEFDRLGHVITTPSALPHKMDVETVGLTDKNEDGSFFIHLNERP     | 107             |
| Lm    | 58 | HCYGDRPVLLDCTGALLORRQRORROELQSRASOLVAARADLLKTKNLWSMRRIRARR      | 118             |
| Li    | 58 | HCYGDRPVLLDCTGALLORRQRORROELQSRASOLVAARADLLRTKNLWSMRRIRARR      | 118             |
| Tb5a  |    | TOVPSAAPSINLROLLGOAG-----                                       | 78              |
| Tb5b  |    | TOVPSAAPSINLROLLGOAG-----                                       | 78              |
| Tco-1 |    | WRVDAAAPFINVTOLLDTFC-----                                       | 79              |
| Tco-2 |    | WRVDAAAPFINVTOLLDTFC-----                                       | 79              |
| Tc    |    | SRVAVTTPYINPROLFGHAG-----                                       | 127             |
| Lm    |    | QNKELSVIPVSAVGDAGNDADRDNEDSTARAPSGAAEGGDSTSOLLSELSRQRKAITHEMK   | 178             |
| Li    |    | QNKELSAVSAVGDAGGDAGRGSGDSTARAPSGAAEGGDSTSHLLSELSRQRKAITHEMK     | 178             |
| Tb5a  |    | -----VLLODITDEETP-----IILLPCPNTEGNVTVHPNHNYRLVKFVGEHMCLAG---    | 124             |
| Tb5b  |    | -----VLLODITDEETP-----IILLPCPNTEGNVTVHPNHNYRLVKFVGEHVCPEAG---   | 124             |
| Tco-1 |    | -----LILLQDVTVPSCP-----IVLLPCPRTGNVTVTPNREYKLVKFI GEHLCLAG---   | 125             |
| Tco-2 |    | -----LILLQDVTVPSCP-----IVLLPCPRTGNVTVTPNREYKLVKFI GEHLCLAG---   | 125             |
| Tc    |    | -----LILLQDVTVPRHP-----IILLPCPHTGNVTVHPRRRYRLMKFI GEHMCLAG---   | 173             |
| Lm    |    | EIRRELLTILLOEKRKQAAATRDGCVLMLPSPETGEVQLFPGHYRTVCFVGEDELREVLPSD  | 238             |
| Li    |    | EIRRELLTILLOEKRKQAAATRDGCVLMLPSPETGEVQLFPGHYRTVCFVGEDELREVLPSD  | 238             |
| Tb5a  |    | -----AMSHANNNSKTDHVAIAAKDGEA--E-KKSPLRSDIWAMAELW                | 164             |
| Tb5b  |    | -----DFFPAN--DHEIDAITFTAEGNKL--H-KKRVFOSKKLADSTLG               | 163             |
| Tco-1 |    | -----DISRNGAHGPESAE TNNGKSSNE--T-GKKPSHLDIWEMTELY               | 165             |
| Tco-2 |    | -----DLAEVNDVNIITIKETKE-----QOOSRFDLWAKTSLG                     | 157             |
| Tc    |    | -----DFYPVLDEEYOQRONSSE-----AFRTRQRESWAMSELM                    | 208             |
| Lm    |    | ARDTDVATAHHWQRRTPPLRKLASEGVAREVSEKDEGGAGGEHTSAKVGERPLWAMAELL    | 298             |
| Li    |    | A---DVATAHHWQHRTPPPLRKLASEGVARELSGNDEGGAEGEHTSAKMAERPLWAMAELL   | 295             |
| Tb5a  |    | AVIAFMOEHRAS-----CVODFLSLPVERMATMYSRGLVNLRRCCFSGVESFSSDEEVE     | 220             |
| Tb5b  |    | SLMVFLQSNKIS-----YARDFIMTKPEEVEIYK GKATAAMMRHCTKGVLEFSSDEEVE    | 219             |
| Tco-1 |    | AFVCYLKDHGGS-----CLQDFLSLP-----VDKIOFTIIPKG                     | 197             |
| Tco-2 |    | GVLVYLKDKHGS-----TPRDFLSLHHSEAERYNVRGTADITQRCIKMAESTKHI GEVE    | 211             |
| Tc    |    | GMMKFLQSNPON-----SLDDEFWALPPEEAARMHSRGNVALIERSEGIQSGNDDEMESV    | 262             |
| Lm    |    | GCVLVLRQCRRNPHYRPRRGATFDDDNIECOEGRGRVDFDKIAASTISYDMVDQYLALPA    | 358             |
| Li    |    | GVVLVLRQCRRNPHYRSRRGATFDDDSIECOEGRGRVDFDKIAASTISYDMVDQYLALPA    | 255             |
| Tb5a  |    | ESEVCEYEGKED EED                                                | 232 100%/100%   |
| Tb5b  |    | ESEVCEYEGKED EED                                                | 231 72.0%/80.2% |
| Tco-1 |    | TEISK                                                           | 197 32.1%/45.3% |
| Tco-2 |    | TEISK                                                           | 215 39.0%/53.4% |
| Tc    |    | SDDELGGASSSSSSSNGDS                                             | 280 27.2%/35.3% |
| Lm    |    | CEMAMYREWAI DKFKLLPP                                            | 377 11.5%/18.9% |
| Li    |    | CEMAMYREWAI DKFKLLPPQ                                           | 375 13.9%/21.4% |

**Figure S8.** ClustalW sequence alignment of trypanosomatid CITFA-5 homologues. Since the available *T. vivax* CITFA-5 sequences were incomplete, CITFA-5 sequences of *Trypanosoma congolense* (Tco), another African trypanosome, were analyzed instead. GeneDB accession numbers of the sequences are Tb927.8.4030 and Tb927.8.4080 (Tb5a), Tb927.8.4130 (Tb5b), congo400e01.p1k\_3 (Tco-1), congo240a09.q1k\_19 (Tco-2), Tc00.1047053503897.140 (Tc), LmjF10.0650 (Lm), LinJ10.0990 (Li). In contrast to the CITFA-5 paralogues of African trypanosomes, the *T. cruzi* paralogue (Tc00.1047053509561.50) was nearly identical to its TcCITFA-5 counterpart and therefore not analyzed. Putative N-terminal extensions of the *T. cruzi* and *Leishmania* proteins were not included in this alignment.

```

Tb          MAVQP-GKVLAEQFSROGIQYEESS-IDV 26
Tv  MIQIHFRDQFWRNIF---YMSISLILLIEEMRP-GNSLAVQFCROGMRYEES-SDT 52
Tc  MNIVLVVVFICHLCSVNF---VYLVLVLFILKLEMAS-GKVLADQFRROGIRYEEA-SGI 54
Lm  MQELAQQFEQOGRCSADAPQRLWCSECTIYREDIAKFNDPLSEREGGVGVKAEGETGT 60
Li  MQELAQQFEQOGRCSADAPQRLWCSECTIYREDIAKSNDRHSELKGRVGVKAEGETGT 60

Tb  LWCSLCTKADSLLEIISRA-----TVEDVLEHCRLROHLLIMEKET 66
Tv  LWCSLCTTAOKLEIITAP-----TKENVLEHCCKOKRHLLCMEKEM 92
Tc  LWCSLCTNAKGLEIIEVE-----SKDSVLEHCALKRHLLIMEKOL 94
Lm  LDEAARADSDSGSSPSTPGPTRARHTRTPSPSLCTLEATKKAVLAHCATRTHLYLYECHV 120
Li  LDEAARADSDFGSSPSTPGQTRARHTSTPSPSLCTLEATKKAALLAHCATRTHLYLYEYHV 120

Tb  VK--EHYCPVEINGRSELLDHNCVYPSIMFGKGRMLLDDTLG--CVMTEDEVCGGVKLLIPR 122
Tv  LK--EYYCPVEINGRFRMLLDHNCIYPVVMFGRGRMLLDDTLG--CTMAVDVCGGVKLLIPR 148
Tc  AM--DQYCPVEINGCYMLLDHHCVYPAVMFGRGRMLLDDTLG--CLIPEDVCGGVKLLIPR 150
Lm  QNGLOHWCVELEHGYRMLLSHHCTIYPSRMFGDGRILLMDTSSGGMLLGVDCGGVKLWPO 180
Li  QNGLOHWCVELEHGYRMLLSHHCTIYPSRMFGDGRILLMDTSSGGMLLGVDCGGVKLWPO 180

Tb  HKYTVVVELVLP-----PAGTPIPK-----141
Tv  HKYTVVVELLIS-----PSTAPVPT-----167
Tc  HKYTVVVELLIP-----HSTVPLPH-----169
Lm  HOYTAVELLIPSAISGVREVLVPPVSMGAGEESQORASEAGSGKQORASSPPLPRNLPGSR 240
Li  HOYTAVELLIPSAISGVREVLVPPVSMGAEESQORVSEAESGKQORASSPPLPRNLPGSR 240

Tb  -----DPSYVVE 148
Tv  -----EPEYVVE 174
Tc  -----KPDYFVE 176
Lm  VIRIHEASEIPAENVAGSYNSALNGSRRKGGSKAMRSLDRGPAGTSGGRASSSIVPRYFDE 300
Li  VVRIHEASEIPAENVASSYNSALNGSRRKGGSKAMRSLDRGPAGRSGGRVSSSIVPRYFDE 300

Tb  RP-VRSRRCHEK-FDSWLOVENSVEGESALMKRRRIAEFSQINM 190 100%/100%
Tv  RP-IRSRKYITG-VKLLKQHNKSVDEGESALMKRRRVSEFQINM 216 57.4%/70.8%
Tc  RE-VRSRRCRLG-MDICLAYNKSVEGETAVMKRRRTVEGRVNMQGI 221 52.5%/66.1%
Lm  FHRIRSORVMEGSLKTVLEATNASTIGEARI RRRRRYAVKHNKTIETKGGKTAAGDEQ 358 22.3%/33.5%
Li  FHRIRSORVMEGSLKTVLEATNASTIGEARI RRRRRYAVKHNKTIETKGGKTAGSDEQ 358 22.1%/33.1%

```

**Figure S9.** ClustalW sequence alignment of trypanosomatid CITFA-6 orthologues. GeneDB accession numbers of the sequences are Tb927.5.970 (Tb), tviv1195b03.q1k\_2 (Tv), Tc00.1047053508303.44 (Tc), LmjF35.1270 (Lm), LinJ35.1360 (Li). The *T. cruzi* paralogue (Tc00.104705351179.114) is nearly identical to the TcCITFA-6 analyzed.



**Table S1:** List of peptides identified by LC/MS/MS

CITFA-1: Tb11.47.0010 (19% coverage)

YILINNILCR  
EVINTDKDLR  
SGVHLWSAFQR  
HRLLENLADGYSR  
TGSAYSSFHAFHTGLPK  
GTATLGSAEDNCNHLSVGEFDPTAYVDSISK

CITFA-2: Tb09.211.3440 (30% coverage)

KLCEPR  
HMLVQPR  
EVYISMR  
YALVSPR  
ELKVEMVTR  
VAPFLEVVR  
EFVIITITKR  
IAFTDLLYHKR  
MLELSSSIEGPISDAR  
EVYCMQLLAPTASPVPWR  
TGSAPIFSAEDRVLDDPLFNTVPVATYR

CITFA-3: Tb11.47.0008 (30% coverage)

TCYVMR  
DFNLLK  
QILYTAASR  
LRGESSPFR  
ANDVEELMAR  
ISSTNNPFSE  
LVLLCSDDVRR  
GPSVPALFEVQR  
MLQDAHYHFSSAEHR  
EQVWDNIVDVGEGVK  
VSGEVTHPLTVEALQMIGGTTR

CITFA-4: Tb11.01.0240 (37% coverage)

FKEVYR  
GTVLATSR  
LAIISHFHR  
YTVTPGVNTER  
STLASALPLLATK  
ETKPQLDEDTLAPLR  
SPVSLASDTVVDVAVR  
EVLGGFSPEELAYLR  
VGTANAEEDDMKEEVR  
GCRPLGNTGIYCSFNCLR  
TLLLSNSSVFAKPSLTAR

CITFA-5a: Tb927.8.4030 / Tb927.8.4080 (33% coverage); \* peptides specific for this paralogue

MATYYSR\*  
LAGQEVVK  
ECGTDEEAHFVIR  
VTQVPSAAPSLNLR  
ASCVQDFLSLPVER\*  
SKECGTDEEAHFVIR  
FVGEHMCLAGAMSHANNNSK\*

CITFA-5b: Tb927.8.4130 (22% coverage); \* peptides specific for this paralogue

LAGQEVVK  
ECGTDEEAHFVIR  
DFLMLKPEEVEIYK\*  
VTQVPSAAPSLNLR  
SKECGTDEEAHFVIR

CITFA-6: Tb927.5.970 (80% coverage)

IAFSQLNM  
VLAEQFSR  
QHLLLMEK

ADSLEIISR  
RIAFSQLNM  
ATVEDVLEHCR  
EHYCPVEINGR  
ETVKEHYCPVEINGR  
SFLLDHNCVYPSTMFGK  
YTVVEIVIPPAGTPIPK  
QGIQYEESTDVLWCSLCTK  
MLLDDTLGCVMTEDEVCGGVK  
FDSWIQVHNSSVEGESALMK

DYNLL1: Tb11.50.0007 / Tb11.0845 (18% coverage); \*\* subtilisin digest

NADMPEDMQSDAVEVA\*\*

### ***Initial purification and analysis of the promoter-binding complex (detailed protocol)***

Thirty liters of procyclic cells were harvested, washed with 200 ml of medium without FBS or hemin, and resuspended in lysis buffer (20 mM PIPES pH 7.5, 15 mM NaCl, 60 mM KCl, 0.5 mM EGTA, 4 mM EDTA, 0.5 mM DTT, and protease inhibitors — 0.5 mM PMSF, 1  $\mu$ M leupeptin, 2  $\mu$ g/ml aprotinin, 1  $\mu$ M pepstatin A, 0.1 mM TLCK) at a density of  $4 \times 10^9$  cells/ml. Cells were disrupted by two cycles of freezing at  $-20^\circ\text{C}$  and thawing. Nuclei were pelleted by centrifugation for 20 min at 15,000 g and  $4^\circ\text{C}$ , resuspended in nuclei buffer (20 mM HEPES pH 7.6, 420 mM KCl, 1.5 mM  $\text{MgCl}_2$ , 0.2 mM EDTA, 25% glycerol, and protease inhibitors) at a concentration equivalent to  $2 \times 10^{10}$  cells/ml, and homogenized with 20 strokes of a type B pestle in a Dounce homogenizer. The homogenate was centrifuged for 30 min at 25,000 g and  $4^\circ\text{C}$ . The soluble nuclear extract was subjected to chromatographic purification by a protocol that was devised by empirical testing. All steps were carried out at  $4^\circ\text{C}$  and purification was monitored by EMSA. A 25–50% saturation ammonium sulfate precipitate was extensively dialyzed against buffer A1 (20 mM HEPES pH 7.6, 20% glycerol, 0.2 mM EDTA, 2mM DTT, and protease inhibitors) and passed through a column of S-Sepharose cation exchanger (Amersham) equilibrated with the buffer A1. The flow-through was adjusted to 2.5 mM  $\text{MgCl}_2$  and 0.2 M NaCl and applied to a HiTrap Heparin column (Amersham) pre-equilibrated with buffer A1 containing 2.5 mM  $\text{MgCl}_2$  and 0.2 M NaCl. After eluting with 0.8 M NaCl, precipitating with 50% ammonium sulfate, and dialyzing extensively against buffer A3 (10 mM HEPES pH 7.6, 10% glycerol, 60 mM NaCl, 0,2 mM EDTA, 2 mM DTT), the sample was adjusted to 40 mM DTT, 0.1 mM spermine, 1 mM spermidine and 0.05% Tween20, and loaded onto a Streptavidin Sepharose High Performance column (Amersham) pre-equilibrated with PBS and loaded with an 82-bp *VSG* ES promoter, PCR-amplified from plasmid ESP3 using one biotinylated and one normal primer. After elution with buffer A3 containing 1 M NaCl, and extensive dialysis against buffer B1 (bis-Tris-propane pH 7.0, 10% glycerol, 100 mM NaCl and 2 mM DTT), the extract was loaded to a Resource Q column (Amersham) pre-equilibrated with buffer B1. After a stepwise increase in NaCl concentration to 350 mM, the complex was eluted with a linear gradient 350-500 mM NaCl. The active fractions were loaded onto 4 ml 15–45% (v/v) linear glycerol gradients in buffer A4 (10 mM HEPES, 150 mM NaCl, 0.1 mM EDTA, 1 mM DTT) and centrifuged at 50,000 rev/min in a Beckman SW 60 rotor for 16 hr at  $7^\circ\text{C}$ . Fractions of 250  $\mu$ l were collected from the bottom.

The purified protein complex was reduced (20 mM dithiothreitol) and alkylated (100 mM iodoacetamide) in Laemmli loading buffer, resolved on a 10% SDS-PAGE Tris-glycine gel and silver-stained. Each visible band was excised, destained, dehydrated and treated with 100 ng of modified TPCK-trypsin for 8 hr at  $37^\circ\text{C}$ . Peptides were extracted by sonication in an aqueous mixture of 2.5% formic acid and 0.1% TFA for 5 min at  $50^\circ\text{C}$ , then transferred to a ZipTip (Millipore) containing 200  $\mu$ g Poros 20R2 beads (Applied Biosystems). After multiple washes with 0.1% aqueous TFA, peptides were eluted with 20  $\mu$ l 40% acetonitrile, 0.1% TFA, followed by 20  $\mu$ l 80% acetonitrile, 0.1% TFA, and these eluates were combined prior to lyophilization. The resulting peptide mixtures were resuspended in 0.01% (v/v) TFA in water/methanol/acetic acid (945:50:5 v/v/v) and subjected to LC-ESI-MS/MS analysis using an HPLC system (Smart System, Amersham) connected directly to an electrospray ion trap mass spectrometer (LCQ DECA, Thermo Fisher Scientific). Peptide mixtures were resolved on a reverse-phase column (Magic  $\text{C}_{18}$ , 50 mm x 0.2 mm, 100 $\text{\AA}$ ; 5  $\mu$ m; Michrom Bioresources) with a fast-rising methanol gradient (7 min) at a flow rate of 40  $\mu$ l/min pre-column split to 2.8  $\mu$ l/min. MS fragmentation analysis was performed on the most intense ion observed at 2-second intervals. Protein searches were performed with SonarMSMS (Genomic Solutions) using locally collated versions of the available *T. brucei* genome data in 2001, with a re-analysis in May 2005.
